# Supplementary material
Source: PubMed Central journal article supplement (PMC2659272)
Supplement: en.2008-1202_2.pdf [file en.2008-1202_2.pdf]

**Supplemental Table 1: Serum T4 Levels (ng/ml) with PTU Treatment**

| Genotype | Diet   | 4 Days         | 7 Days         | 14 Days    |
|----------|--------|----------------|----------------|------------|
| WT       | Normal | 53.3 ± 2.5     | 57.5 ± 7.6     | 46.8 ± 3.5 |
| PAM+/-   | Normal | 57.8 ± 0.9     | 63.7 ± 0.4     | 42.8 ± 0.9 |
| WT       | PTU    | 26.0 ± 2.2 *** | 4.8 ± 2.4 ***  | < 0.01 *** |
| PAM+/-   | PTU    | 25.8 ± 3.2 *** | 0.11 ± 0.1 *** | < 0.01 *** |

Serum T<sub>4</sub> was measured by radioimmunoassay in WT and PAM<sup>+/-</sup> mice kept on a normal diet or the low iodine/PTU diet for 4, 7 or 14 days.

**Supplemental Table 2: Baseline TRH Data from RIAs**

| Region | Mouse  | TRH-NH <sub>2</sub><br>ng/mg | TRH-Gly,<br>ng/mg | Total TRH<br>ng/mg | % Gly/Total<br>TRH |
|--------|--------|------------------------------|-------------------|--------------------|--------------------|
| PVN    | WT     | 2.4 ± 0.2 **                 | 0.22 ± 0.03       | 2.7 ± 0.2 *        | 8.34 ± 0.92        |
|        | PAM+/- | 1.4 ± 0.15 **                | 0.29 ± 0.07       | 1.7 ± 0.2 *        | 16.0 ± 2.45        |
| POA    | WT     | 2.5 ± 0.4                    | 0.20 ± 0.02 **    | 2.7 ± 0.4          | 8.6 ± 1.3          |
|        | PAM+/- | 2.7 ± 0.3                    | 0.47 ± 0.08 **    | 3.2 ± 0.3          | 15.4 ± 2.6         |

Levels of TRH-Gly and amidated TRH in POA and PVN extracts prepared from PAM<sup>+/-</sup> (N=7 or 8) and WT (N= 7 or 8) mice are reported. For the PVN, one-way ANOVAs revealed a significant reduction in TRH (p=0.003), a significant increase TRH-Gly (p=0.003) and a significant decrease in total TRH (p=0.01) in PAM<sup>+/-</sup> mice when compared to WT littermates. Peptide concentrations may vary more than the TRH-Gly percentage because of variability in the protein measurements and dissection of individual hypothalamic nuclei.
