# Supplementary material
Source: PubMed Central journal article supplement (PMC2659272)

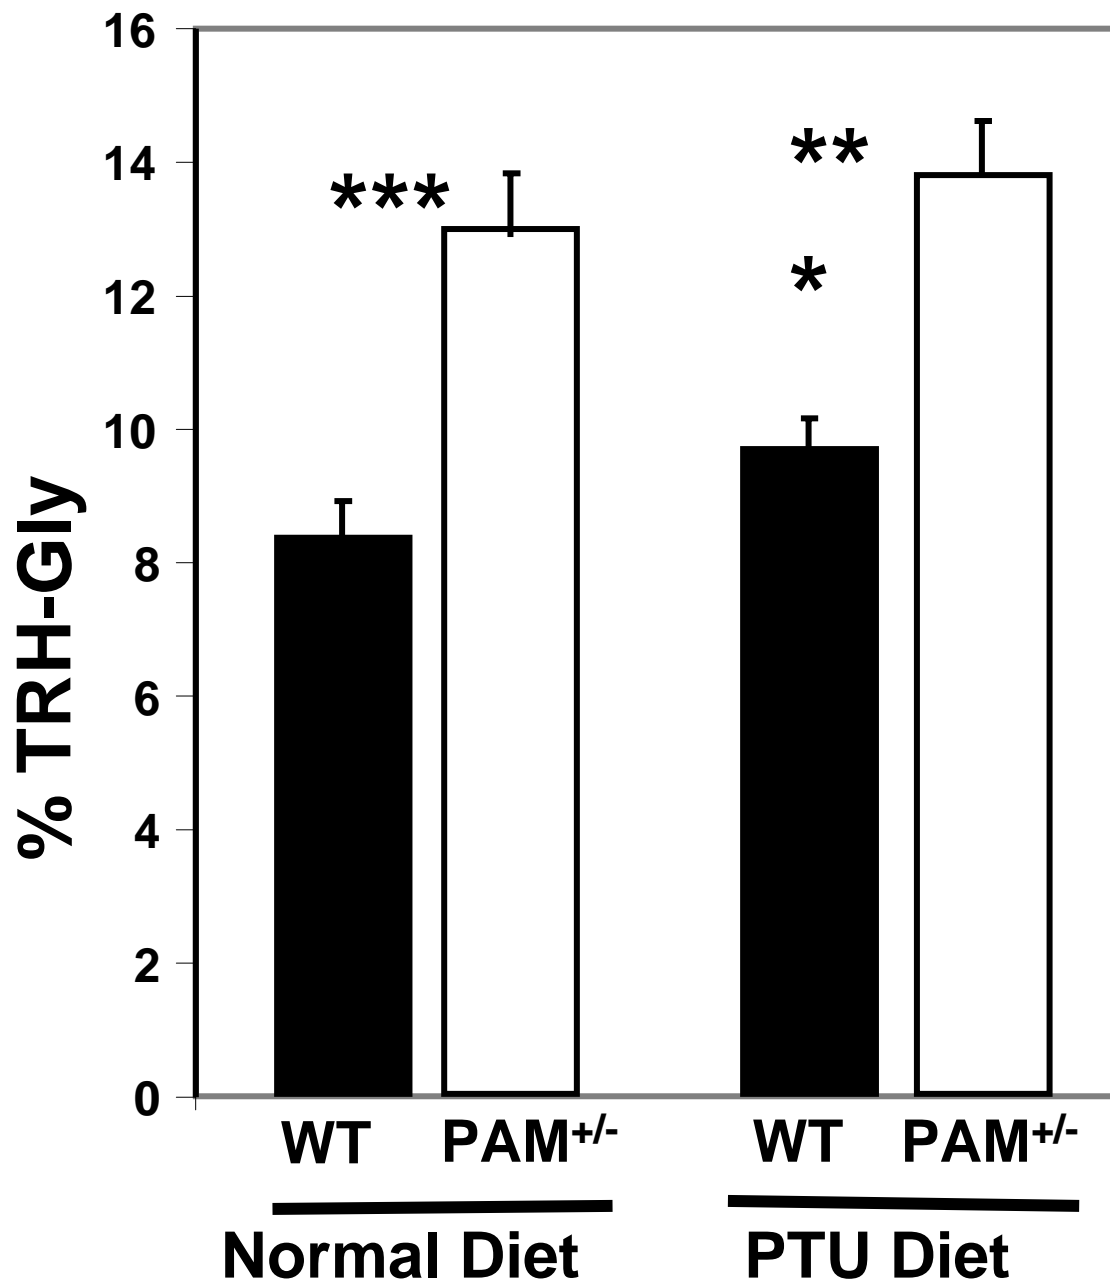

Supplementary Figure S1

Supplement: en.2008-1202_3.pdf [file en.2008-1202_3.pdf]

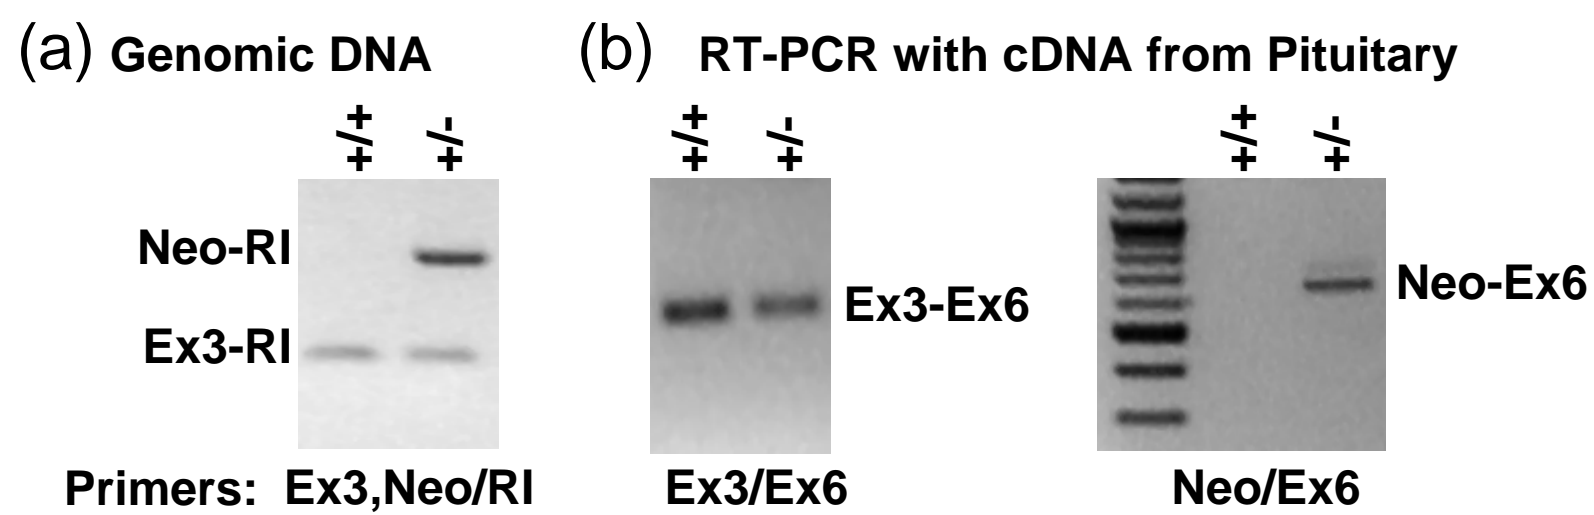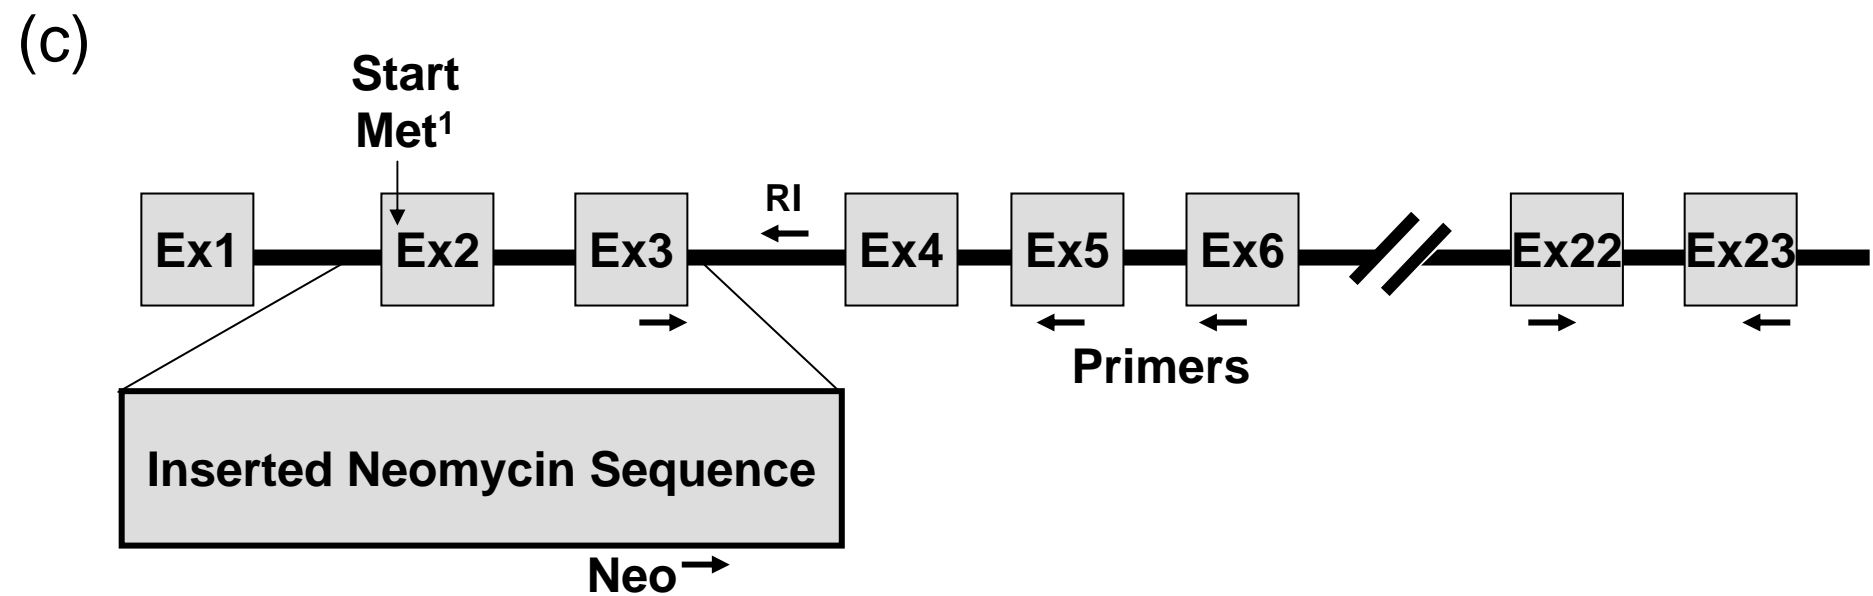

Supplementary Figure S2

Supplement: en.2008-1202_4.pdf [file en.2008-1202_4.pdf]

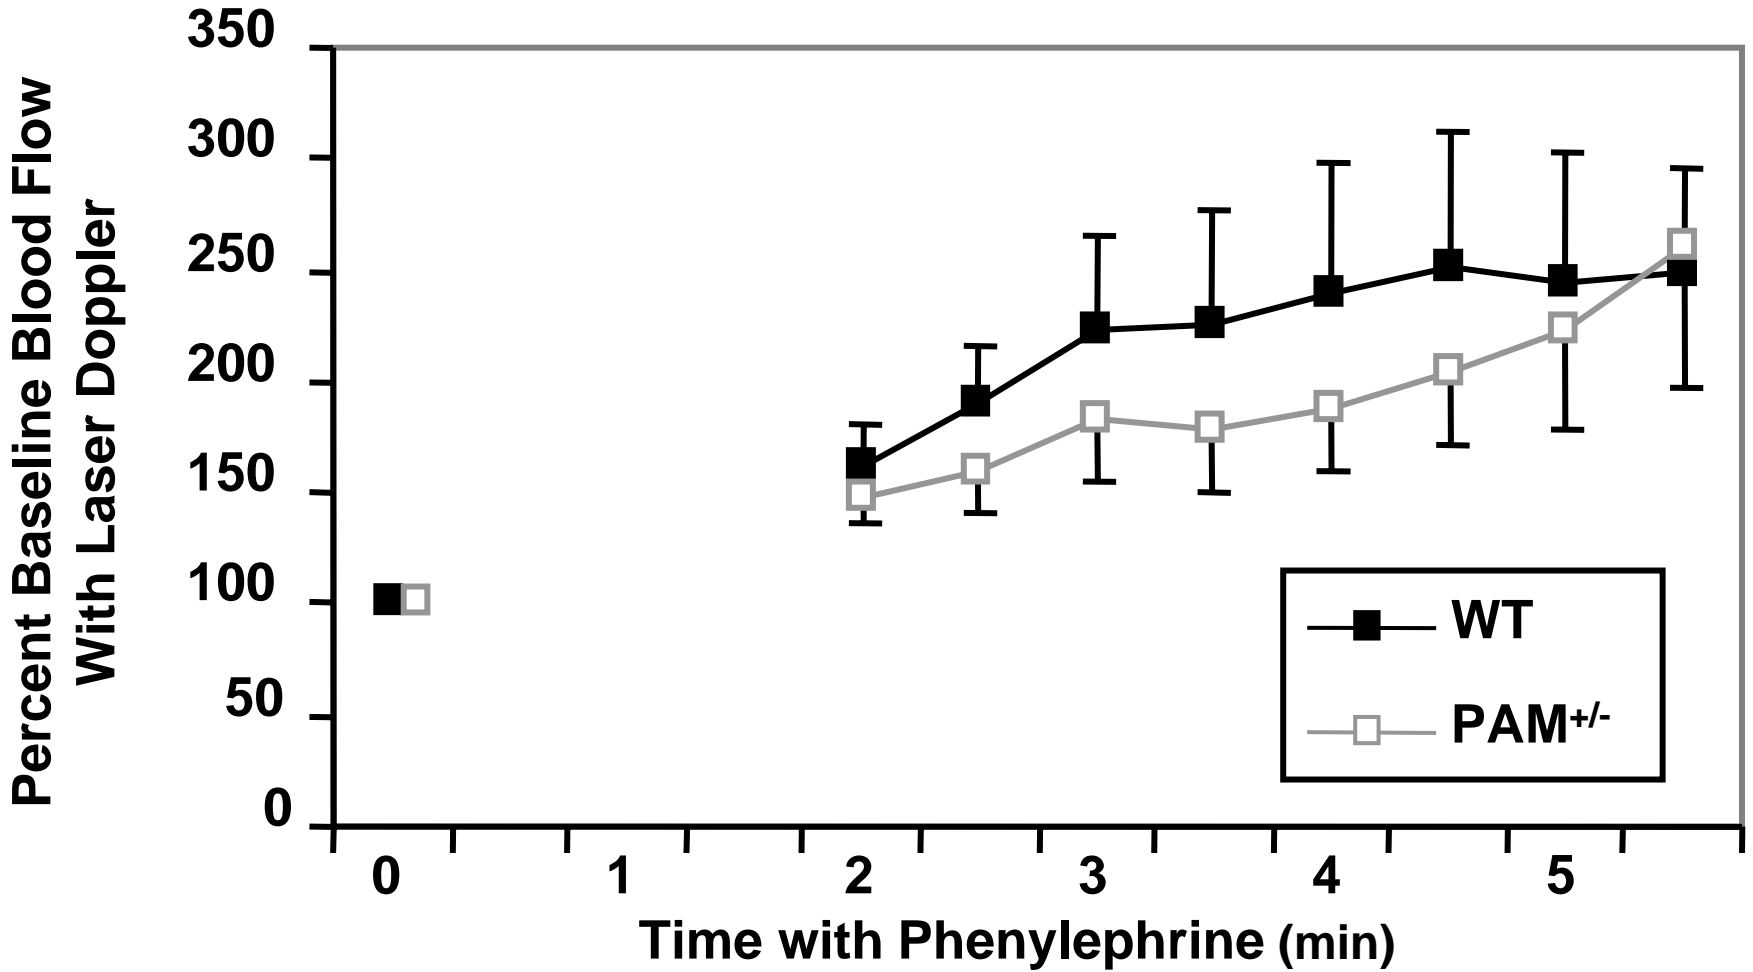

Supplementary Figure S3

Supplement: en.2008-1202_5.pdf [file en.2008-1202_5.pdf]
